# Supplementary material for: Haspin regulates Ras localization to promote Cdc24-driven mitotic depolarization
Source: PubMed Central journal article supplement (PMC7308332; doi:10.1038/s41421-020-0170-2), 2020-06-23
Supplement: 41421_2020_170_MOESM3_ESM.pdf [file 41421_2020_170_MOESM3_ESM.pdf]

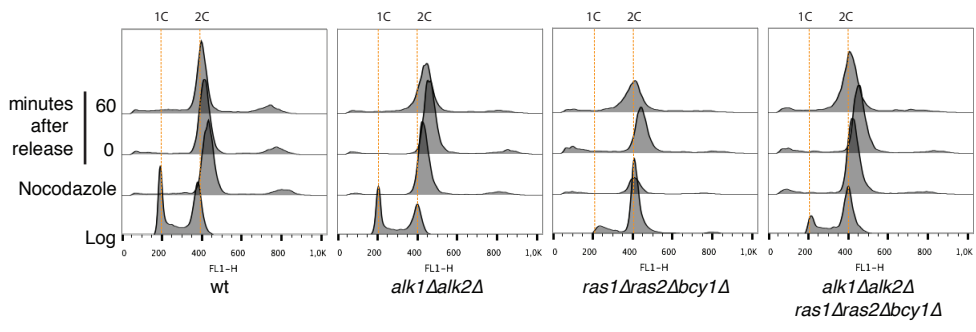

### **S3. Related to Figure 3.**

Cell-cycle analysis by FACS of experiment in Figs. 3a-b. Cells were synchronized in G2/M phase by 3 hours nocodazole treatment. 1C and 2C refer to the amount of DNA in the cells.
