# Supplementary material for: Haspin regulates Ras localization to promote Cdc24-driven mitotic depolarization
Source: PubMed Central journal article supplement (PMC7308332; doi:10.1038/s41421-020-0170-2), 2020-06-23
Supplement: 41421_2020_170_MOESM4_ESM.pdf [file 41421_2020_170_MOESM4_ESM.pdf]

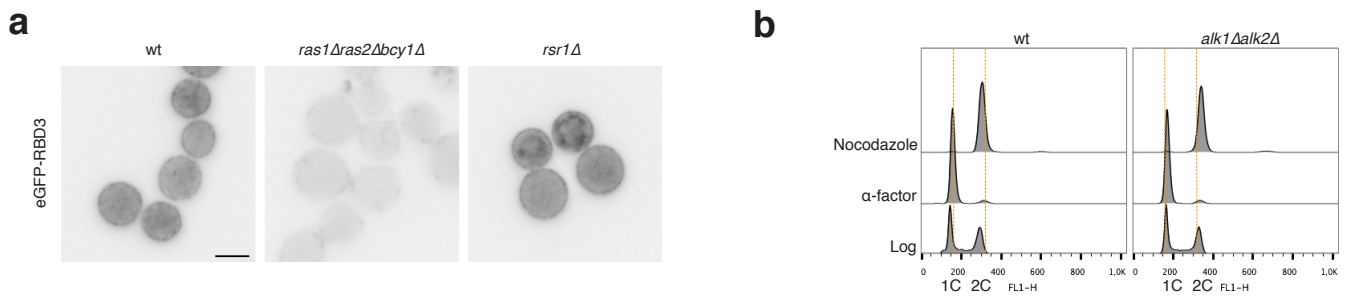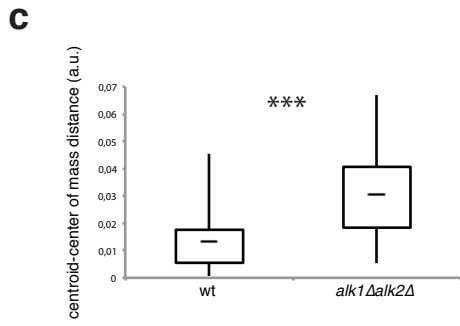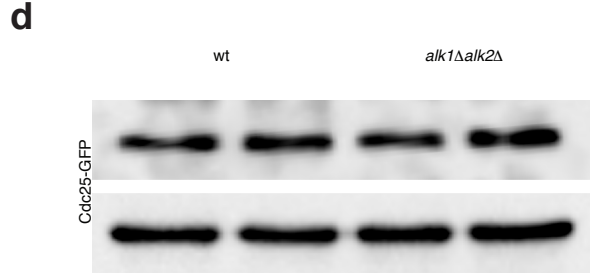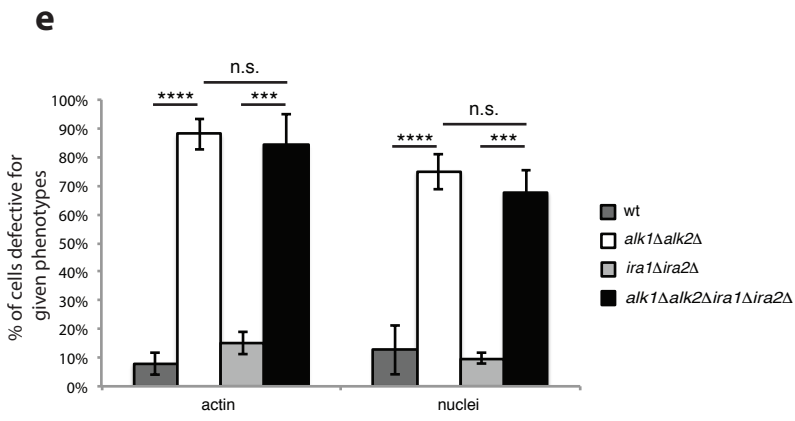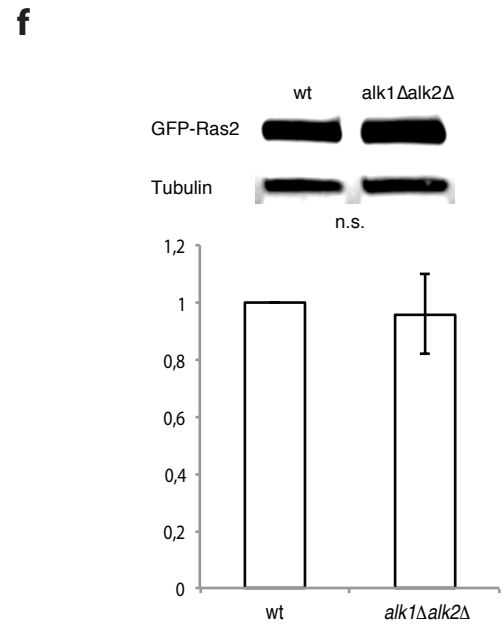

#### Fig S4. Related to Figure 4.

(a) Specificity of the eGFP-RBD3 probe was evaluated comparing the fluorescence signal observed in wt strains, in cells lacking *RAS* or lacking *RSR1*; scale bar: 5 $\mu$ m. Plot (b) shows the cytofluorimetric analysis of the cell cycle arrests for the experiment described in Figs. 4a-b. (c) shows the centroid-center of mass distance, normalized on daughter area and average daughter cell circularity, of 60 cells from 3 independent experiments treated as in Figs. 4a-b. Boxes include 50% of data points, line represents the average distance and whiskers report the minimum and maximum values. (d-e) Cells of the indicated strains were arrested in G1 and then released for 2.5 hours in nocodazole. Panel (d) shows representative images of the localization of Cdc25-GFP in wild-type or haspin-lacking cells. Graph (e) reports the impact of *IRA1* and *IRA2* deletion on actin and nuclear segregation scored by fluorescence microscopy from 3 independent experiments, counting 100 cells per repeat; error bars represent standard deviation. Panel (f) shows a western blot analysis of the expression levels of *GFP-RAS2* for the experiment in Figure 4c-e. Data from 3 independent experiments are plotted in the right panel. Scale bars in a,d: 5 $\mu$ m. Error bars correspond to standard deviation. t-test was applied as a statistical measurement in (c,e,f); n.s.: not significant; \* : p-value <0.05; \*\* : p-value <0.01; \*\*\* : p-value <0.005; \*\*\*\* : p-value <0.001.
